# Supplementary material for: Inspired by Skeletal Muscles: Study of the Physical and Electrochemical Properties of Derived Lignocellulose-Based Carbon Fibers
Source: MDPI journal article supplement (doi:10.3390/ma15228068), 2022-11-15
Supplement: s1 [file s1]

## Supplementary Information

**Table S1.** Amounts of linking modes and monomer for poplar lignin and S/G ratio.

| Sample        | $\beta$ -O-4 | $\beta$ - $\beta$ | $\beta$ -5 | S/G  |
|---------------|--------------|-------------------|------------|------|
| Poplar lignin | 56.57        | 6.45              | 2.07       | 1.54 |

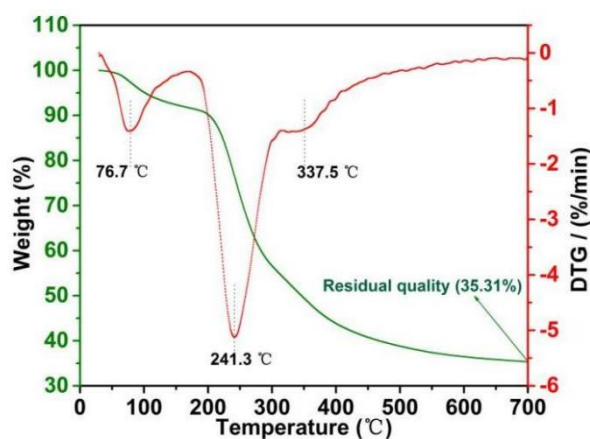

**Figure S1.** TG and DTG curves of poplar lignin.

**Table S2.** Elemental compositions of the samples.

| Atomic (%)    | C     | O     | N    | Sn   |
|---------------|-------|-------|------|------|
| Poplar lignin | 63.68 | 35.31 | 1    | —    |
| MCC           | 56.77 | 42.65 | 0.58 | —    |
| L-precursor   | 70.75 | 22.89 | 6.22 | 0.14 |

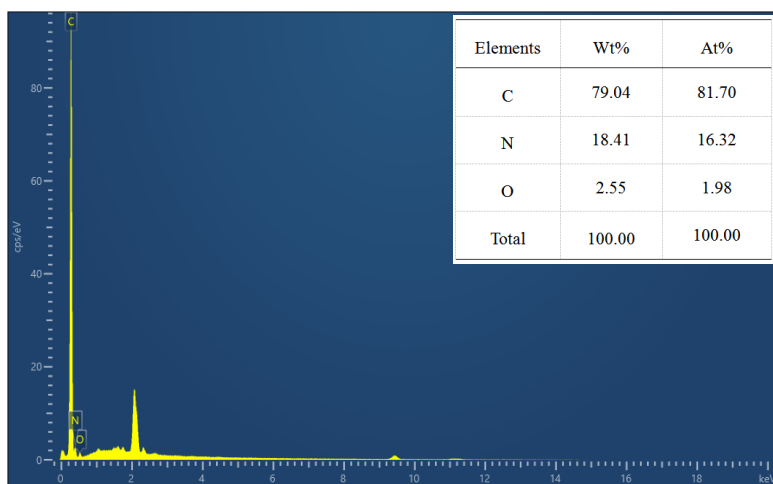

**Figure S2.** Element analysis of lignocellulose-based PFs.

**Table S3.** BET results of CFs.

| Sample | BET surface area (m <sup>2</sup> /g) | Pore volume (cm <sup>3</sup> /g) | Pore size (nm) |
|--------|--------------------------------------|----------------------------------|----------------|
| CFs    | 4.3489                               | 0.3081                           | 10.0258        |

**Table S4.** Fitting values for the parameters of the Nyquist plots.

| R <sub>s</sub> /Ω | R <sub>cd</sub> /Ω | W      | C <sub>d</sub> | C <sub>1</sub> |
|-------------------|--------------------|--------|----------------|----------------|
| 1.18              | 0.14               | 0.0059 | 0.0008         | 0.0059         |

**Table S5.** Production of CFs from some lignocellulose-based blends and their advantages of characteristic.

| Carbon fiber precursor                                        | Spinning process     | The advantage of characteristic                                                                                                                                | Refs |
|---------------------------------------------------------------|----------------------|----------------------------------------------------------------------------------------------------------------------------------------------------------------|------|
| Lignin–cellulose acetate                                      | Electrospinning      | Derived CFs showed independent filamentous morphology, uniform diameter, large surface area, excellent mechanical property, and power storage capacity         | [5]  |
| Eucalyptus dissolving pulp and organosolv/kraft lignin blends | Dry-jet wet spinning | Lignin reduced the vapour adsorption in the fibre and had the positive effect on the carbonisation yield                                                       | [57] |
| Plant protein–lignin                                          | Electrospinning      | The well-engineered structural characteristics                                                                                                                 | [58] |
| Cellulose–chitosan                                            | Dry-jet wet spinning | Improved the carbon yield and structural properties                                                                                                            | [59] |
| Lignin/PAN                                                    | Electrospinning      | Derived CFs had good spinnability, high crystallization and mechanical strength                                                                                | [29] |
| Cotton and cellulose acetate blend with PAN                   | Electrospinning      | Low cost and environmentally friendly alternatives to conventional CF precursors and processing solvents                                                       | [60] |
| Kraft lignin blended with kraft pulps                         | Dry-jet wet-spinning | The best CFs are stronger and stiffer than those produced by melt-spinning of softwood-based lignins alone                                                     | [18] |
| Extracted poplar lignin–MCC/PAN                               | Electrospinning      | Nature-inspired biomimetic structural characteristics and derived CFs had excellent morphology, high graphitization degree and good electrochemical properties | —    |
